# Supplementary material
Source: PubMed Central journal article supplement (PMC10027348)
Supplement: Supp_Fig1.pdf [file Supp_Fig1.pdf]

## Supplementary Data

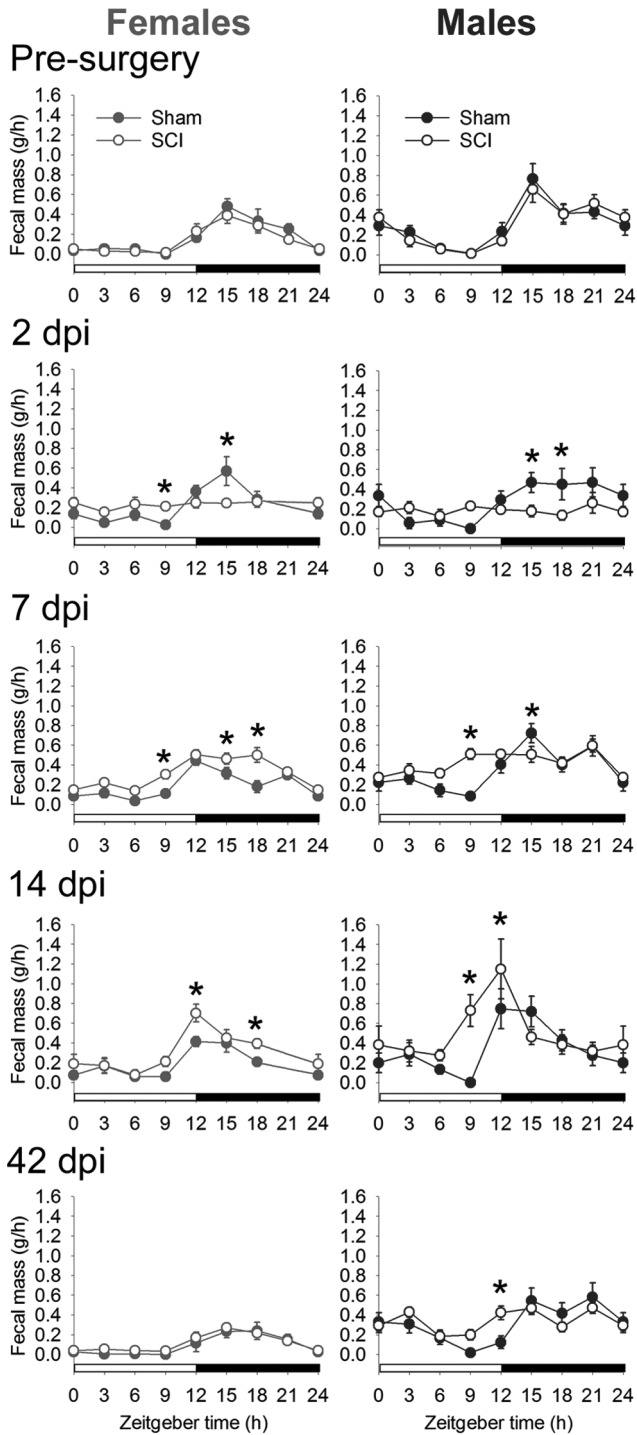

**SUPPLEMENTARY FIG. S1.** In female and male rats, spinal cord injury (SCI) disrupted rhythmic fecal mass output. SCI rats produced altered pellet mass at various times of day. Fecal output mass rhythms were disrupted by SCI (in both females and males) at 2, 7, and 14 days post-injury (dpi). In male rats, SCI-elicited diurnal disruption of pellet production persisted chronically at 42 dpi. \* $p < 0.05$  for sham vs. SCI at that time-point.
