# Supplementary material
Source: PubMed Central journal article supplement (PMC10027348)
Supplement: Supp_Fig2.pdf [file Supp_Fig2.pdf]

## Females

### Pellet number

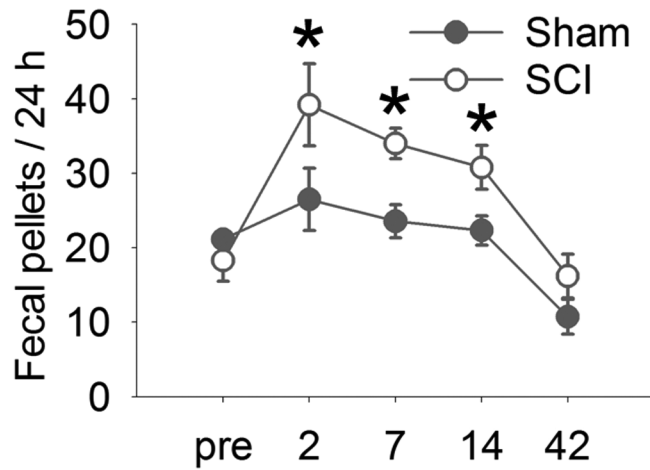

## Males

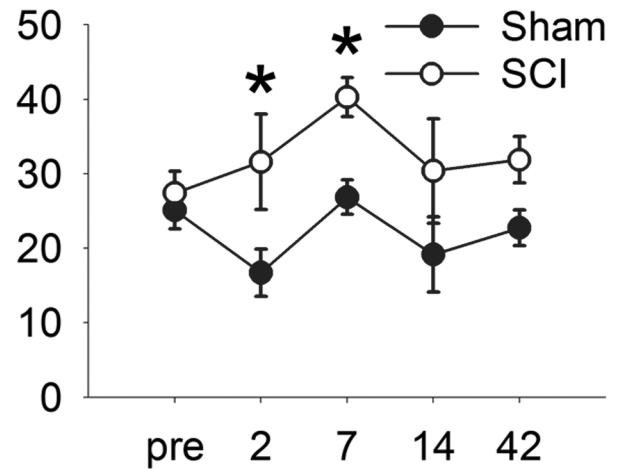

### Fecal mass

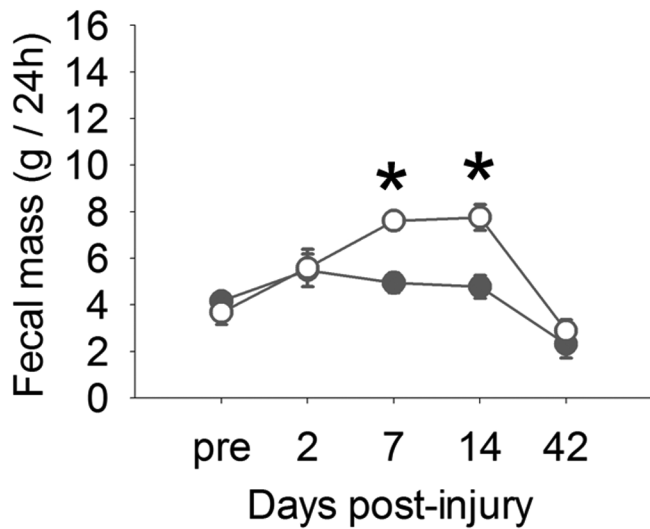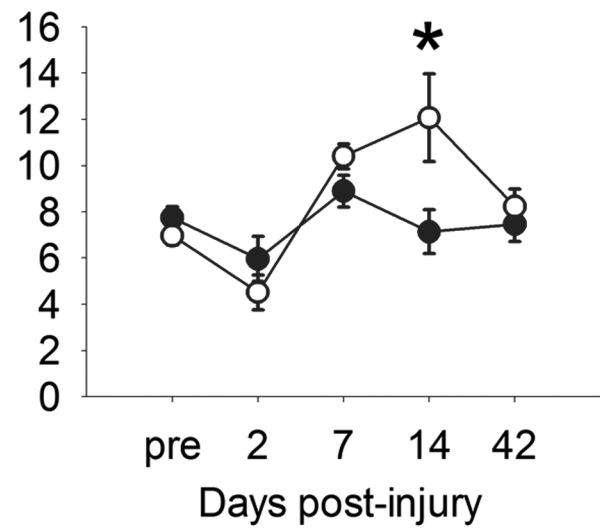

**SUPPLEMENTARY FIG. S2.** Female and male rats with spinal cord injury (SCI) show increased fecal output. Rats subjected to SCI increased daily fecal pellet release (females: at 2, 7, 14 days post-injury [dpi]; males: at 2, 7 dpi). In addition, daily fecal output wet mass was increased from SCI rats (females: at 7 and 14 dpi; males: at 14 dpi). \* $p < 0.05$  for sham vs. SCI at that time-point.
