# Supplementary material
Source: PubMed Central journal article supplement (PMC10027348)
Supplement: Supp_Fig3.pdf [file Supp_Fig3.pdf]

## Females

### Water content

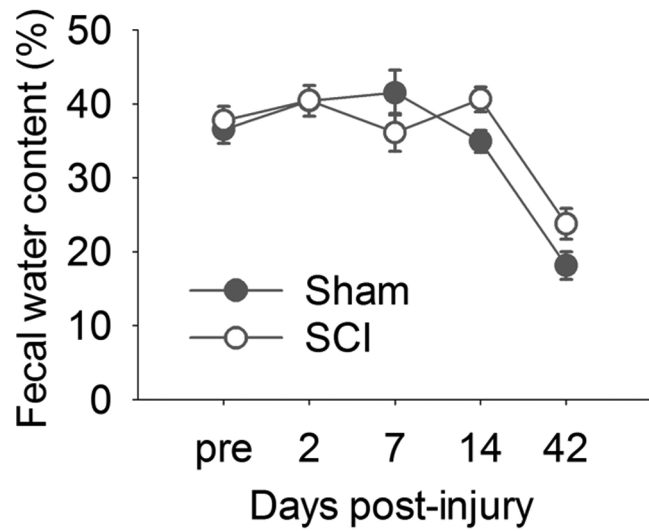

## Males

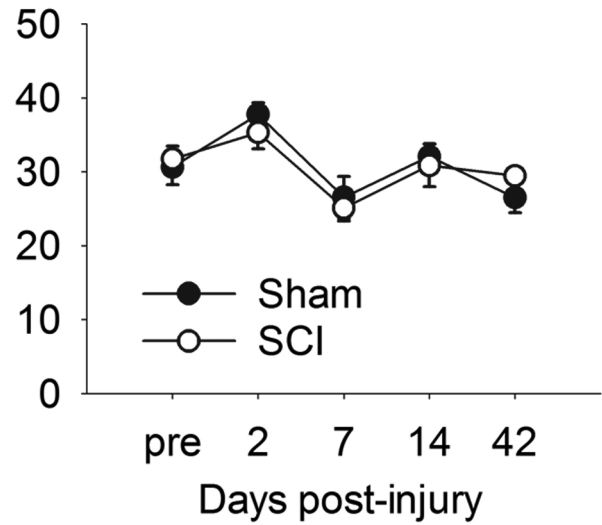

**SUPPLEMENTARY FIG. S3.** Fecal pellets from female and male spinal cord injury (SCI) rats did not have significantly different water content compared to those from sham rats. Water content was measured by weighing wet and dry pellets.
