# Supplementary material
Source: PubMed Central journal article supplement (PMC10027348)
Supplement: Supp_Fig4.pdf [file Supp_Fig4.pdf]

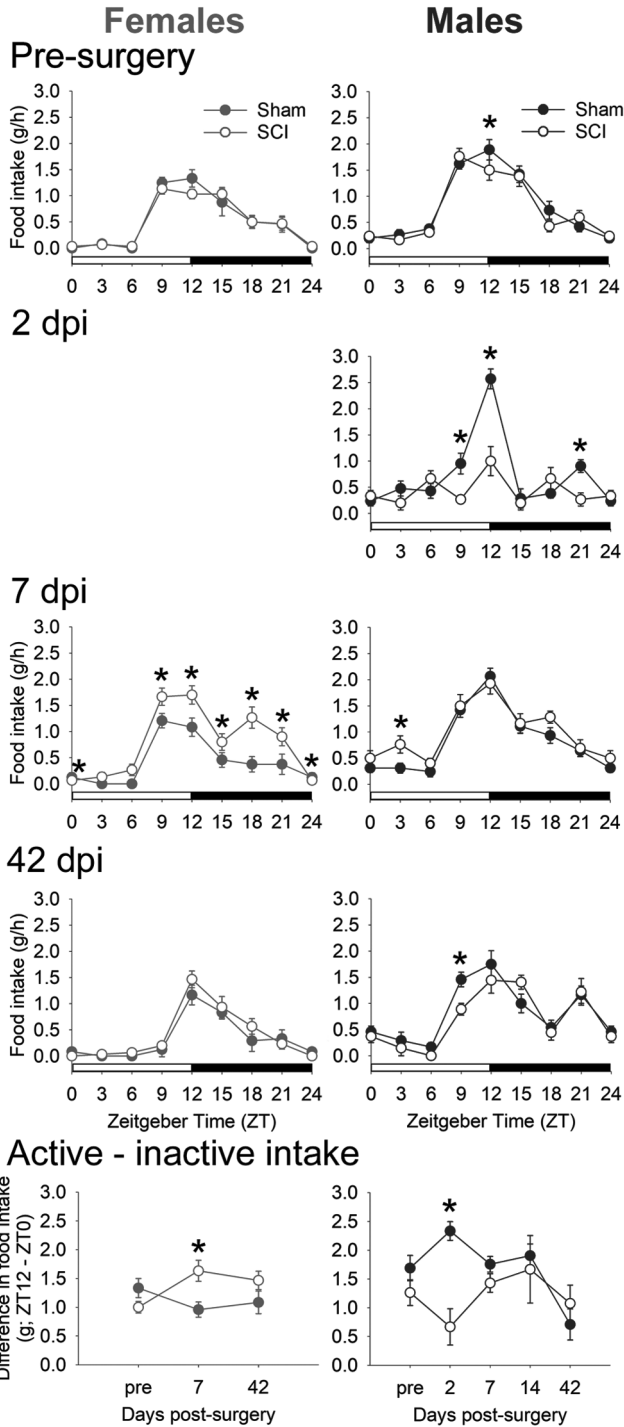

**SUPPLEMENTARY FIG. S4.** In female and male rats, spinal cord injury (SCI) disrupted diurnal food intake. Prior to SCI, rats showed expected diurnal pattern in food intake (highest at start of active phase; no main effects between sham/SCI groups). At 2 days post-injury (dpi), male SCI rats showed dampened diurnal rhythms in food intake (main effect), with less intake than shams during key active feeding times. At 7 dpi, female and male SCI rats ate more throughout the day (main effects, sham vs. SCI). At 42 dpi, SCI rats showed similar food intake to sham rats. Bottom panel: Subtracting inactive (Zeitgeber time [ZT] 0) from active (ZT12) phase intake showed that females had a compensatory increase in food intake at 7 dpi. Males showed less active phase intake at 2 dpi, which normalized by 7 dpi. Across-day food data were not collected in the first female experiment, so there are no data for female 2 dpi and 14 dpi. \* $p < 0.05$  for sham vs. SCI at that time-point.
